# Supplementary material for: Enhancing the Relative Sensitivity of V5+, V4+ and V3+ Based Luminescent Thermometer by the Optimization of the Stoichiometry of Y3Al5−xGaxO12 Nanocrystals
Source: MDPI journal article supplement (doi:10.3390/nano9101375), 2019-09-25
Supplement: s1 [file s1]

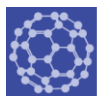

Article

# Enhancing the Relative Sensitivity of $V^{5+}$ , $V^{4+}$ and $V^{3+}$ Based Luminescent Thermometer by the Optimization of the Stoichiometry of $Y_3Al_{5-x}Ga_xO_{12}$ Nanocrystals

Karolina Kniec\*, Karolina Ledwa and Lukasz Marciniak \*

Institute of Low Temperature and Structure Research, Polish Academy of Sciences, Okólna 2, 50-422 Wrocław, Poland; k.ledwa@intibs.pl

\* Correspondence: k.kniec@intibs.pl (K.K.); l.marciniak@intibs.pl (L.M.)

Received: 17 August 2019; Accepted: 24 September 2019; Published: date

## Appendix A

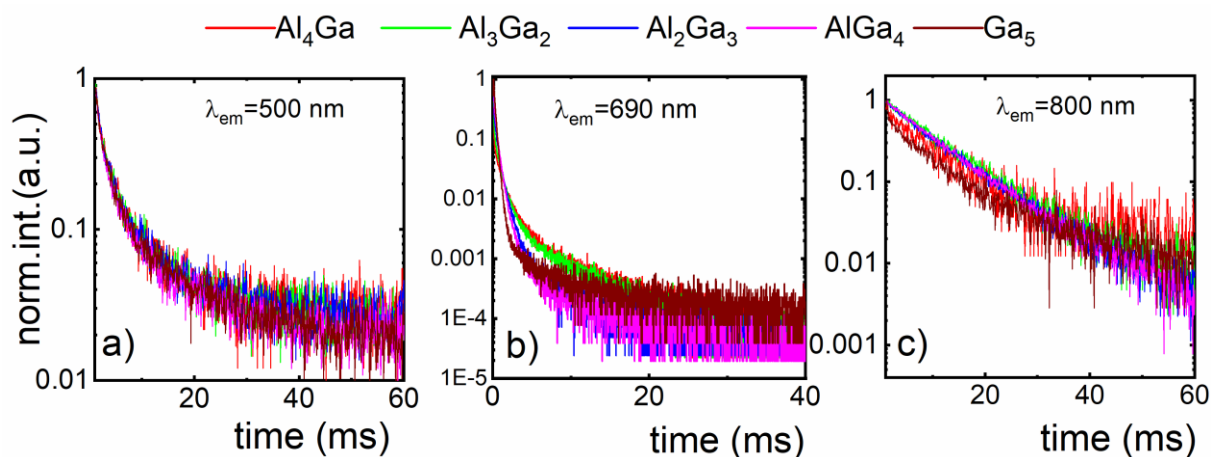

**Figure S1.** (a), (b), (c) The luminescence decay profile of  $V^{5+}$ ,  $V^{4+}$  and  $V^{3+}$  ions for different  $Ga^{3+}$ , respectively.

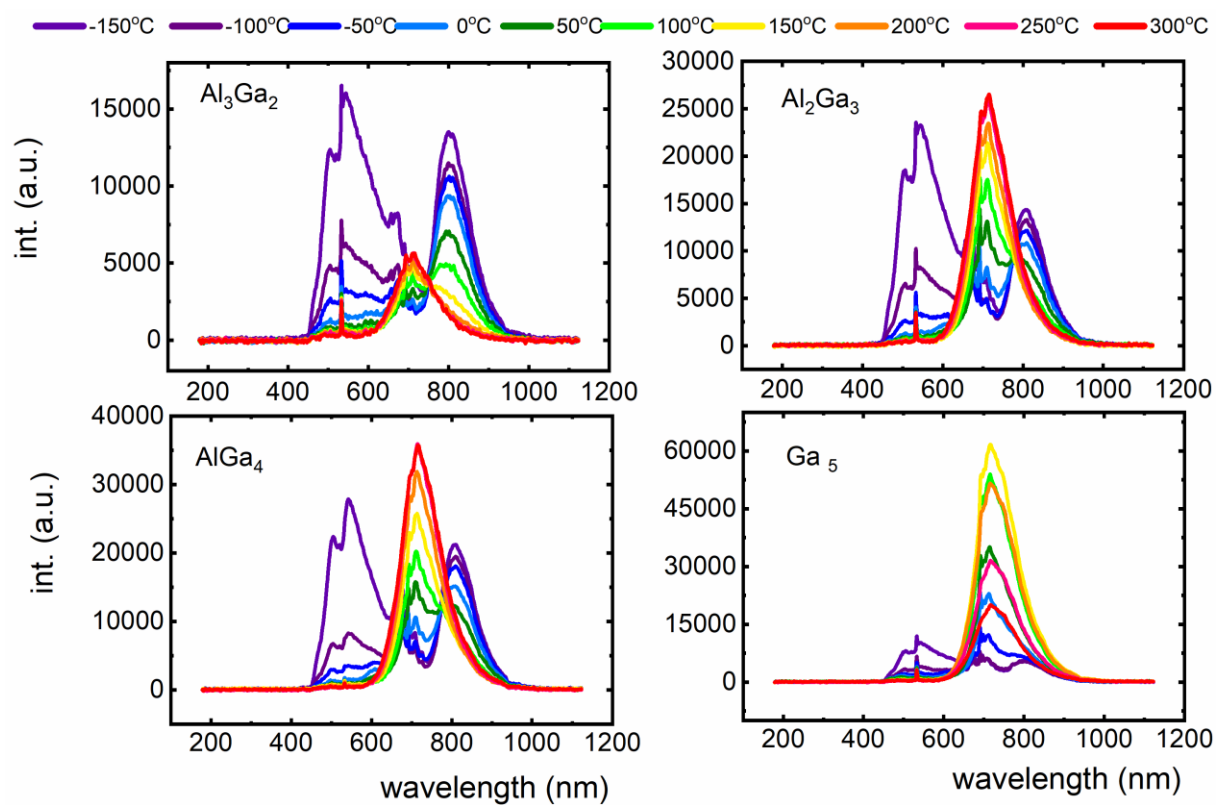

**Figure S2.** Emission spectra of V-doped nanocrystals recorded in the range of -150°C–300°C.
